# Supplementary material for: Proton and Carbon Ion Irradiation Changes the Process of Endochondral Ossification in an Ex Vivo Femur Organotypic Culture Model
Source: MDPI journal article supplement (doi:10.3390/cells12182301), 2023-09-18
Supplement: s1 [file s1]

## Supplementary data

**Table S1.** List of qPCR primers with respective forward (fw) and reverse (rev) primer sequence.

| Target                                                           | Primer | Sequence 5'-3'                  |
|------------------------------------------------------------------|--------|---------------------------------|
| <i>glyceraldehyde-3-phosphate dehydrogenase (GAPDH)</i>          | fw     | CCT-GCA-CCA-CCA-ACT-GCT-TAG-C   |
|                                                                  | rev    | GCC-AGT-GAG-CTT-CCC-GTT-CAG-C   |
| <i>hypoxanthine phosphoribosyltransferase 1(HPRT1)</i>           | fw     | GCG-AAA-GTG-GAA-AAG-CCA-AGT     |
|                                                                  | rev    | GCC-ACA-TCA-ACA-GGA-CTC-TTG-TAG |
| <i>collagen type II alpha 1 chain (Col2<math>\alpha</math>1)</i> | fw     | GGCCAGGATGCCCGAAAATTA           |
|                                                                  | rev    | GTCACCTCTGGGTCCTTGTTT           |
| <i>collagen type X alpha 1 chain (ColX)</i>                      | fw     | CCTCTGAGCACCAGAATCCA            |
|                                                                  | rev    | CGTCAAGGACACTAGCAGCA            |
| <i>Bone morphogenetic protein 2 (BMP-2)</i>                      | fw     | AAGCCAAACACAAACAGCGG            |
|                                                                  | rev    | GCCACGATCCAGTCATTCCA            |
| <i>runt-related transcription factor 2 (Runx2)</i>               | fw     | GCGCATTCCTCATCCCAGTA            |
|                                                                  | rev    | GGTGGGGAGGATTGTGTCTG            |
| <i>Osteoprotegerin (OPG)</i>                                     | fw     | CTCACTTGGCCTCCTGCTAA            |
|                                                                  | rev    | TCGCACAGGGTGACATCTAT            |
| <i>Osteopontin (SPP1)</i>                                        | fw     | CCAGCCAAGGACCAACTACA            |
|                                                                  | rev    | AGTGTTTGCTGTAATGCGCC            |
| <i>Alkaline Phosphatase (ALPL)</i>                               | fw     | CGGTTGGTAGCCTCCTTCTG            |
|                                                                  | rev    | GACGTTCCGATCCTGAGTGG            |

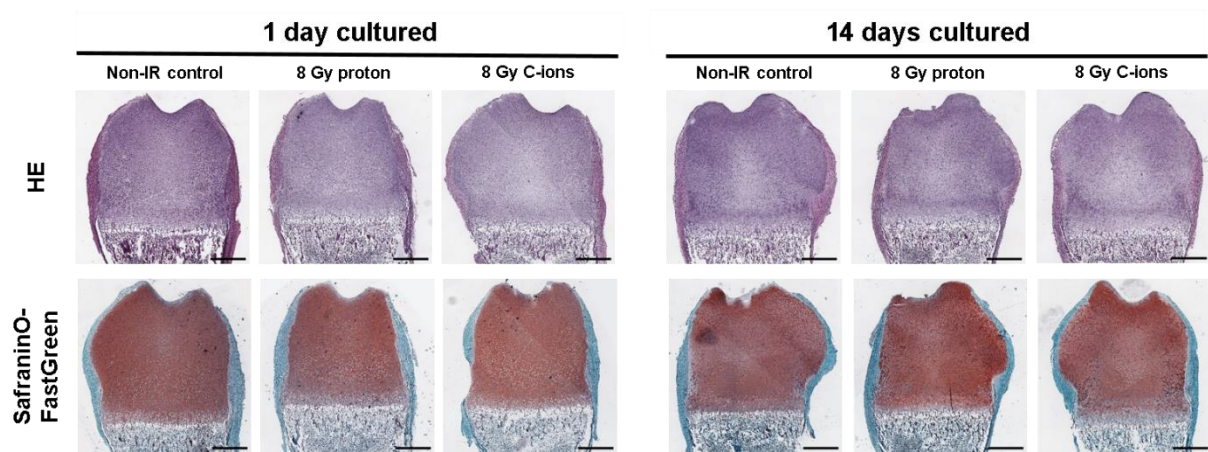

**Figure S1. Overview of distal end of the femur histologically stained.** Representative images of Haematoxylin&Eosin (H&E) and SafraninO-Fast Green staining of *ex vivo* bone cultures exposed to either 8 Gy proton or C-ions radiation with their respective controls followed by subsequent 1- and 14- days *in vitro* (DIV) cultivation. Scale bar – 500  $\mu\text{m}$ .

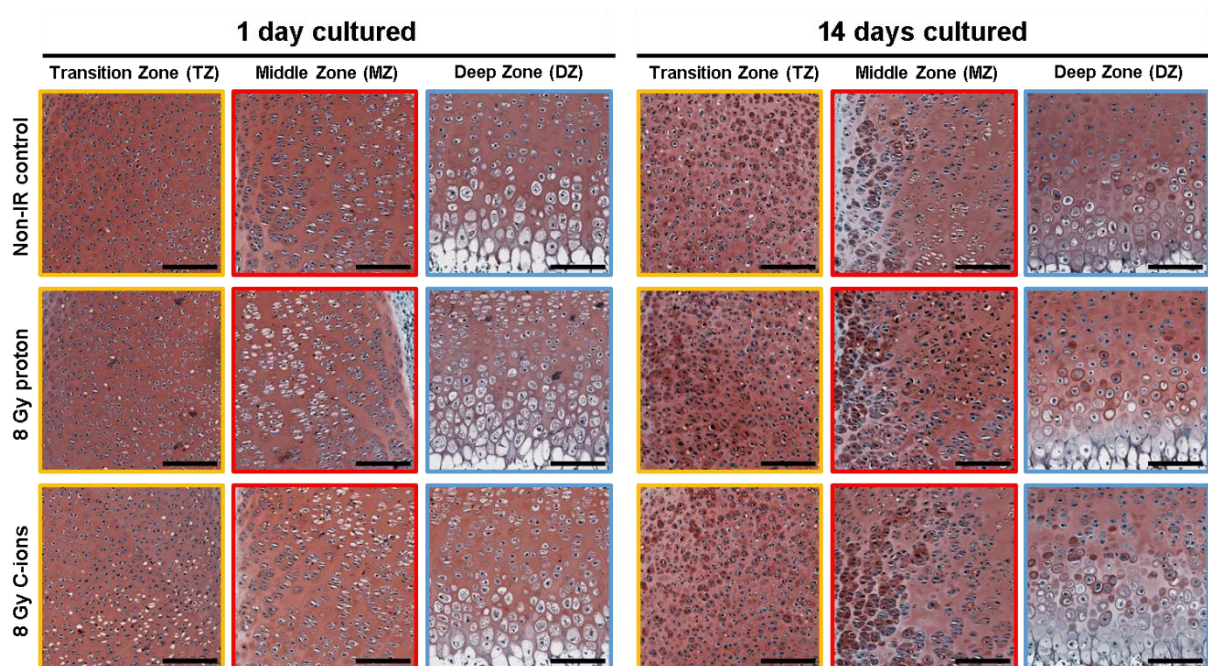

**Figure S2. Increased proteoglycan production due to radiation.** Representative images of Safranin O-Fast Green staining of *ex vivo* bone cultures exposed to either 8 Gy proton or C-ions radiation with their respective controls followed by subsequent 1- and 14- days *in vitro* (DIV) cultivation. Coloured squares represent transition zone (TZ, yellow), middle zone (MZ, red) and deep zone (DZ, blue). Scale bar - TZ/MZ/DZ = 150  $\mu\text{m}$ .



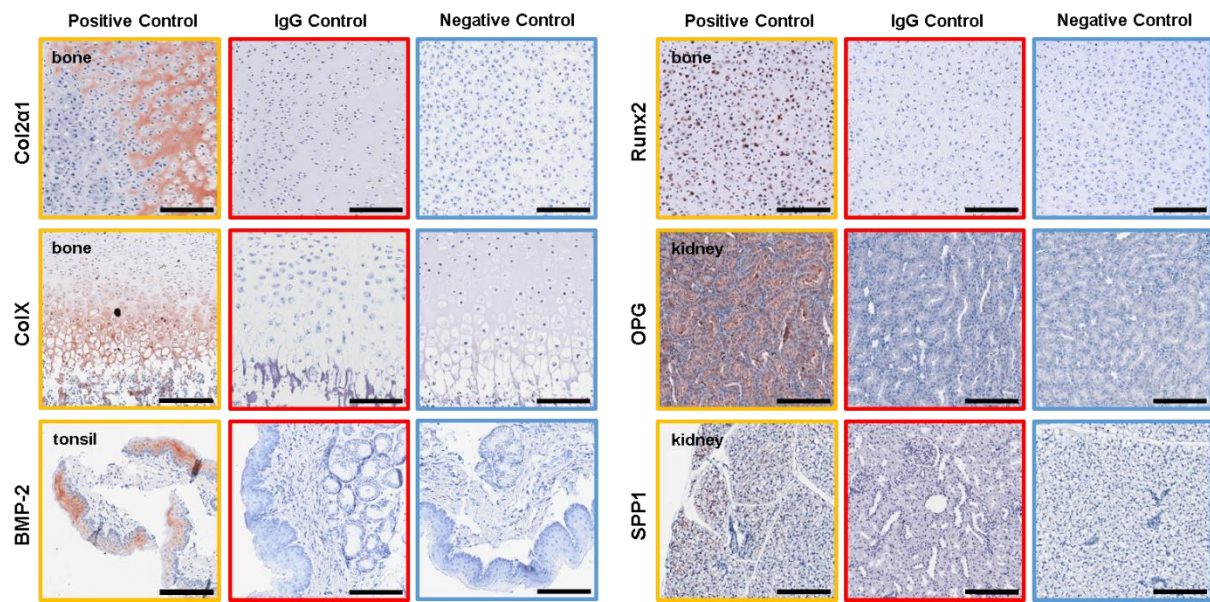

**Figure S3. Immunohistochemistry controls.** Positive control, IgG control – IgG antibody with respective concentration of primary antibody and negative control – only antibody dilution of appropriate tissue for Col2αa, ColX, BMP-2, Runx2, OPG, and SPP1 are presented. Scale bar = 150 μm.

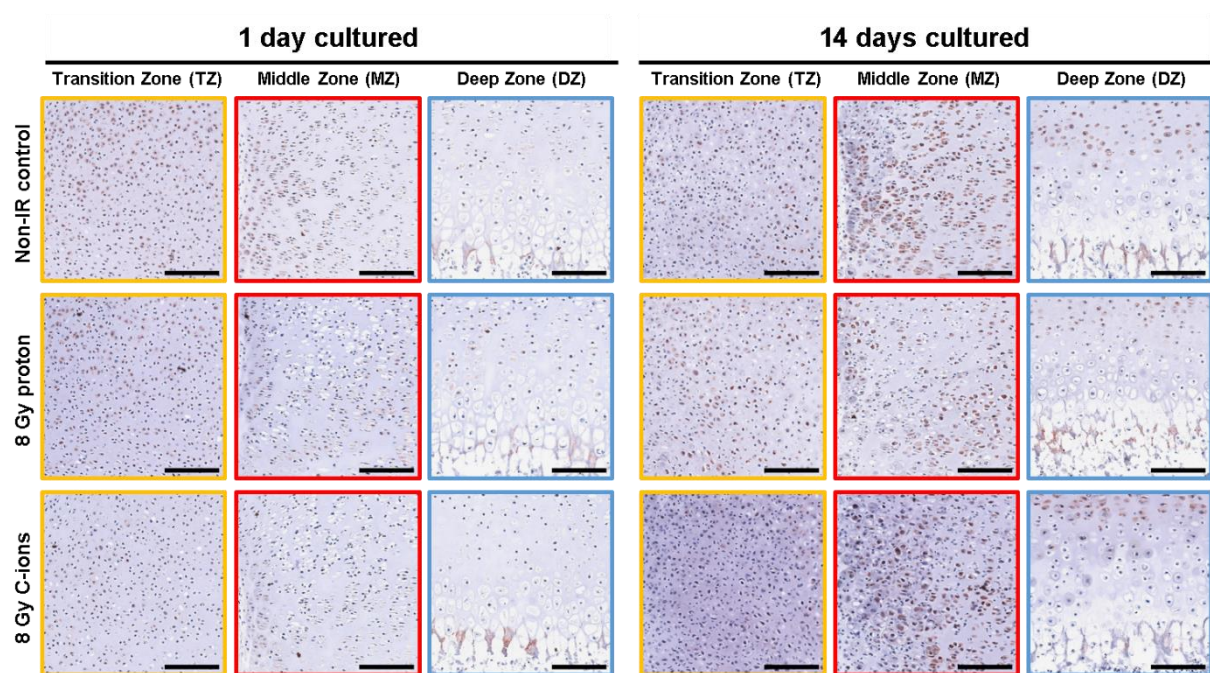

**Figure S4. Immunohistochemistry of Bone morphogenetic factor 2 (BMP-2).** Representative images of BMP-2 IHC of *ex vivo* bone cultures exposed to either 8 Gy proton or C-ions radiation with their respective controls followed by subsequent 1- and 14- days *in vitro* (DIV) cultivation. Coloured squares represent transition zone (TZ, yellow), middle zone (MZ, red) and deep zone (DZ, blue). Scale bar - TZ/MZ/DZ = 150 μm.



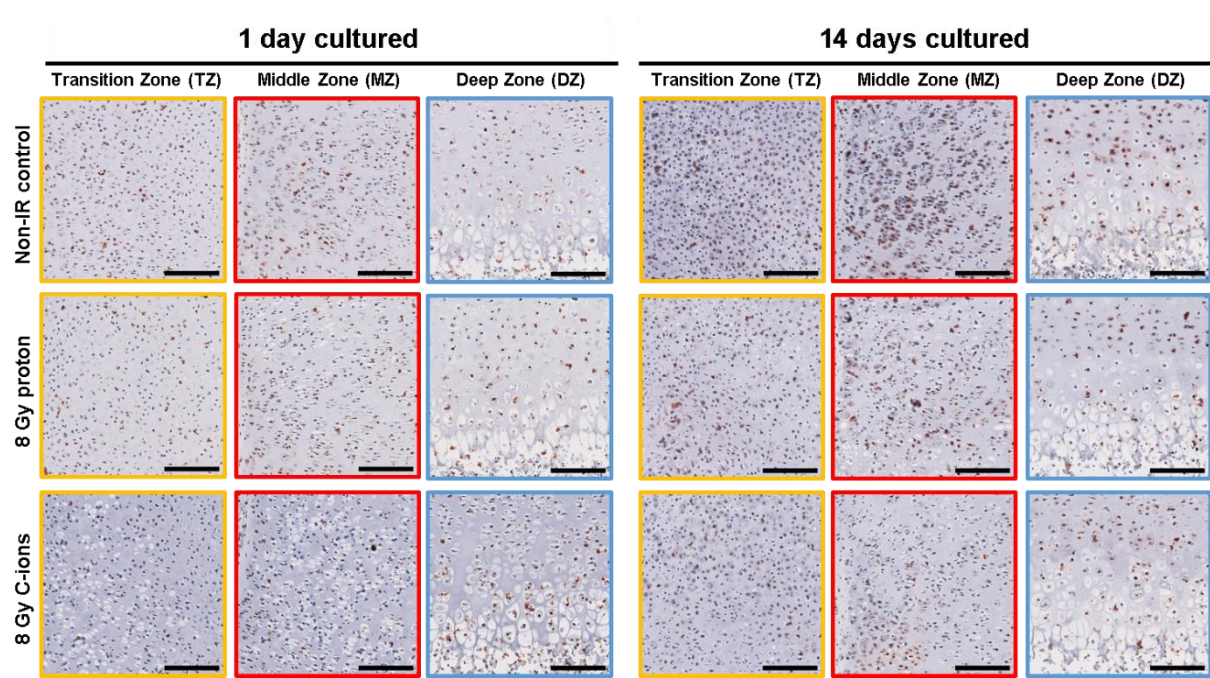

**Figure S5. Immunohistochemistry of runt related factor 2 (Runx2).** Representative images of Runx2 IHC of *ex vivo* bone cultures exposed to either 8 Gy proton or C-ions radiation with their respective controls followed by subsequent 1- and 14- days *in vitro* (DIV) cultivation. Coloured squares represent transition zone (TZ, yellow), middle zone (MZ, red) and deep zone (DZ, blue). Scale bar - TZ/MZ/DZ = 150  $\mu$ m.

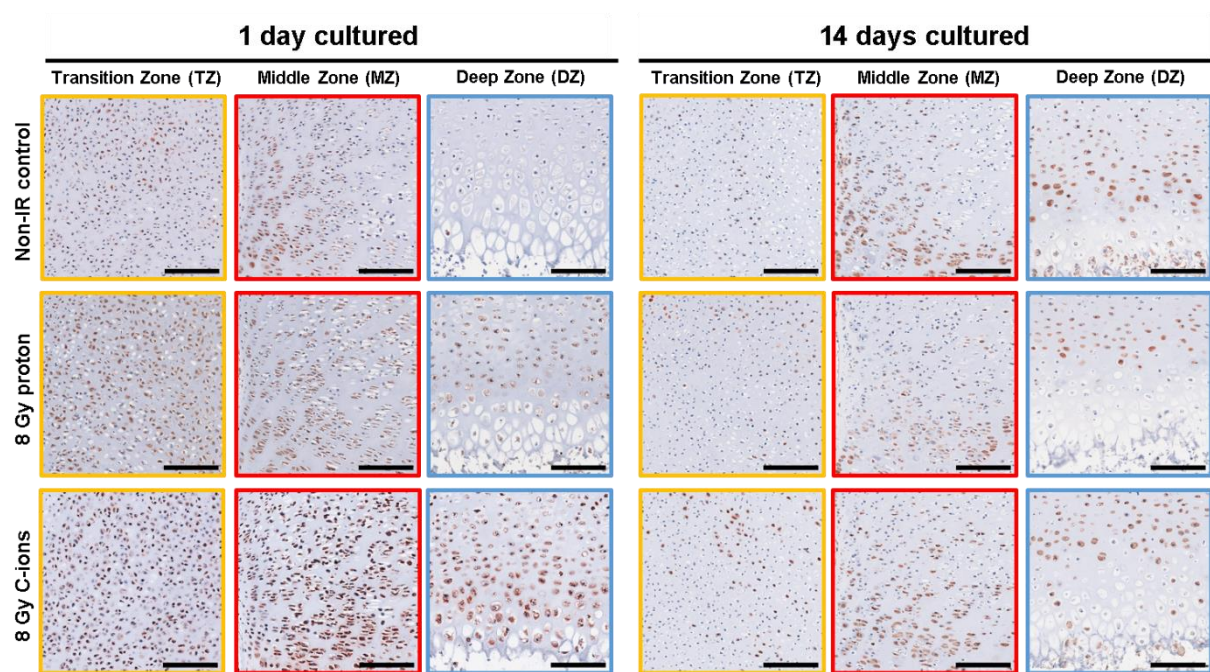

**Figure S6. Immunohistochemistry of Osteopontin (OPG).** Representative images of OPG IHC of *ex vivo* bone cultures exposed to either 8 Gy proton or C-ions radiation with their respective controls followed by subsequent 1- and 14- days *in vitro* (DIV) cultivation. Coloured squares represent transition zone (TZ, yellow), middle zone (MZ, red) and deep zone (DZ, blue). Scale bar - TZ/MZ/DZ = 150  $\mu$ m.
